# Supplementary material for: Effect of Clover Sward Management on Nitrogen Fixation and Performance of Following Spring- and Winter Wheat Crops; Results of a 3-Year Pilot Study
Source: MDPI journal article supplement (doi:10.3390/agronomy12092085), 2022-09-01
Supplement: s1 [file s1]

# Effect of Clover Sward Management on Nitrogen Fixation and Performance of Following Spring- and Winter Wheat Crops; Results of a 3-Year Pilot Study

Andrew Wilkinson <sup>1,2,3</sup>, John N. Wilkinson <sup>1</sup>, Peter Shotton <sup>2</sup>, Mick Eyre <sup>2</sup>,  
Gultakin Hasanaliyeva <sup>2,3</sup>, Paul Bilsborrow <sup>2,4</sup>, Carlo Leifert <sup>2,5,6,\*</sup> and Leonidas Rempelos <sup>2,7</sup>

<sup>1</sup> Gilchester Organics, Stamfordham NE18 0QL, UK

<sup>2</sup> Nafferton Ecological Farming Group, Newcastle University,  
Newcastle upon Tyne NE1 7RU, UK

<sup>3</sup> School of Animal, Rural and Environmental Sciences, Brackenhurst Campus,  
Nottingham Trent University, Nottinghamshire NG25 0QF, UK

<sup>4</sup> School of Natural and Environmental Science, Newcastle University, Newcastle upon  
Tyne NE1 7RU, UK

<sup>5</sup> SCU Plant Science, Southern Cross University, Military Rd.,  
Lismore, NSW 2480, Australia

<sup>6</sup> Department of Nutrition, Institute of Basic Medical Sciences, University of Oslo,  
0372 Oslo, Norway

<sup>7</sup> Lincoln Institute for Agri-Food Technology, University of Lincoln, Riseholme Park,  
Lincoln LN2 2LG, UK

\* Correspondence: carlo.leifert@gmail.com

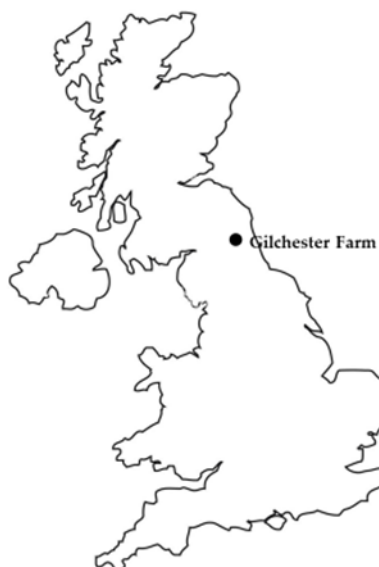

**Supplementary Figure S1.** Location of Gilchester Farm in Northern Britain

**Supplementary Table S1.** Effect of soil depth at which soil samples were taken, *Rhizobium* inoculation of clover seed and greenwaste compost application on total nitrogen (N), nitrate ( $\text{NO}_3^-$ ), ammonium ( $\text{NH}_4^+$ ) and total plant available N ( $\text{NO}_3^- + \text{NH}_4^+$ ) concentrations in soils in October 2005.

| Factors                                                                                                                                                    | Total<br>soil N<br>(%)                              | NO <sub>3</sub> <sup>-</sup><br>(mg/kg) | NH <sub>4</sub> <sup>+</sup><br>(mg/kg) | Total<br>available N<br>(mg/kg) |
|------------------------------------------------------------------------------------------------------------------------------------------------------------|-----------------------------------------------------|-----------------------------------------|-----------------------------------------|---------------------------------|
| Soil depth (cm)                                                                                                                                            |                                                     |                                         |                                         |                                 |
| 0-30                                                                                                                                                       | 0.26 ±0.01 a                                        | 7.9 ±1.9                                | 10.2 ±3.2                               | 18.1 ±4.2                       |
| 30-60                                                                                                                                                      | 0.18 ±0.01 b                                        | 3.0 ±0.8                                | 7.6 ±1.7                                | 10.6 ±2.1                       |
| 60-90                                                                                                                                                      | 0.14 ±0.01 c                                        | 2.6 ±0.6                                | 5.4 ±1.2                                | 8.0 ±1.4                        |
| Rhizobium seed inoculation                                                                                                                                 |                                                     |                                         |                                         |                                 |
| with                                                                                                                                                       | 0.19 ±0.01                                          | 4.3 ±0.9                                | 9.7 ±2.8                                | 13.9 ±2.8                       |
| without                                                                                                                                                    | 0.19 ±0.01                                          | 5.6 ±1.4                                | 5.5 ±0.9                                | 10.3 ±1.5                       |
| Greenwaste compost application                                                                                                                             |                                                     |                                         |                                         |                                 |
| with                                                                                                                                                       | 0.19 ±0.01                                          | 5.8 ±1.3                                | 8.9 ±2.5                                | 14.2 ±4.0                       |
| without                                                                                                                                                    | 0.20 ±0.01                                          | 4.0 ±0.7                                | 6.7 ±1.0                                | 10.5 ±1.2                       |
| 3-factor ANOVA results (p-values)                                                                                                                          |                                                     |                                         |                                         |                                 |
| Main effects                                                                                                                                               |                                                     |                                         |                                         |                                 |
| Soil Depth                                                                                                                                                 | 0.0004                                              | ns                                      | ns                                      | ns                              |
| Rhizobium seed inoculation                                                                                                                                 | ns                                                  | ns                                      | ns                                      | ns                              |
| Greenwaste compost application                                                                                                                             | ns                                                  | ns                                      | ns                                      | ns                              |
| Interactions                                                                                                                                               | 3-factor ANOVA detected no significant interactions |                                         |                                         |                                 |
| Means labelled with the same letter within the same column are not significantly different (Tukey's honestly significant difference test, <i>p</i> < 0.05) |                                                     |                                         |                                         |                                 |

**Supplementary Table S2.** Effect of soil depth, *Rhizobium* inoculation of clover seed and greenwaste compost application on total carbon (C), phosphorus (P) and potassium (K) concentrations in soils in in October 2005.

|                                                                                                                                                            | Soil C                                              | Soil P              | Soil K              |
|------------------------------------------------------------------------------------------------------------------------------------------------------------|-----------------------------------------------------|---------------------|---------------------|
| Soil depth                                                                                                                                                 | %                                                   | mg kg <sup>-1</sup> | mg kg <sup>-1</sup> |
| Soil depth (cm)                                                                                                                                            |                                                     |                     |                     |
| 0-30                                                                                                                                                       | 2.5 ±0.1 a                                          | 22.3 ±0.9 a         | 66 ±3 a             |
| 30-60                                                                                                                                                      | 1.7 ±0.1 b                                          | 9.7 ±1.0 b          | 47 ±3 b             |
| 60-90                                                                                                                                                      | 1.3 ±0.2 c                                          | 4.7 ±0.7 c          | 42 ±4 b             |
| Rhizobium seed inoculation                                                                                                                                 |                                                     |                     |                     |
| with                                                                                                                                                       | 1.9 ±0.1                                            | 12.7 ±1.4           | 47 ±3               |
| without                                                                                                                                                    | 1.7 ±0.1                                            | 11.7 ±0.7           | 52 ±3               |
| Greenwaste compost application                                                                                                                             |                                                     |                     |                     |
| with                                                                                                                                                       | 1.7 ±0.1                                            | 12.3 ±1.1           | 48 ±3               |
| without                                                                                                                                                    | 1.9 ±0.1                                            | 12.0 ±1.2           | 52 ±4               |
| 3-factor ANOVA results (p-values)                                                                                                                          |                                                     |                     |                     |
| Main effects                                                                                                                                               |                                                     |                     |                     |
| Soil Depth                                                                                                                                                 | 0.0017                                              | 0.0001              | 0.0027              |
| Rhizobium seed inoculation                                                                                                                                 | ns                                                  | ns                  | ns                  |
| Greenwaste compost application                                                                                                                             | ns                                                  | ns                  | ns                  |
| Interactions                                                                                                                                               |                                                     |                     |                     |
|                                                                                                                                                            | 3-factor ANOVA detected no significant interactions |                     |                     |
| Means labelled with the same letter within the same column are not significantly different (Tukey's honestly significant difference test, <i>p</i> < 0.05) |                                                     |                     |                     |
